# Supplementary material for: Characterizing the Qatar advanced-phase SARS-CoV-2 epidemic
Source: PubMed Central journal article supplement (PMC7973743; doi:10.1038/s41598-021-85428-7), 2021-03-18
Supplement: 41598_2021_85428_MOESM1_ESM.pdf [file 41598_2021_85428_MOESM1_ESM.pdf]

## Supplementary material

### Characterizing the Qatar advanced-phase SARS-CoV-2 epidemic

Laith J. Abu Raddad,<sup>1,2,3\*</sup> Hiam Chemaitelly,<sup>1,2</sup> Houssein H. Ayoub,<sup>4</sup> Zaina Al Kanaani,<sup>5</sup> Abdullatif Al Khal,<sup>5</sup> Einas Al Kuwari,<sup>5</sup> Adeel A. Butt,<sup>5</sup> Peter Coyle,<sup>5</sup> Andrew Jeremijenko,<sup>5</sup> Anvar Hassan Kaleeckal,<sup>5</sup> Ali Nizar Latif,<sup>5</sup> Robert C. Owen,<sup>5</sup> Hanan F. Abdul Rahim,<sup>6</sup> Samya A. Al Abdulla,<sup>7</sup> Mohamed G. Al Kuwari,<sup>7</sup> Mujeeb C. Kandy,<sup>7</sup> Hatoun Saeb,<sup>7</sup> Shazia Nadeem N. Ahmed,<sup>8</sup> Hamad Eid Al Romaihi,<sup>8</sup> Devendra Bansal,<sup>8</sup> Louise Dalton,<sup>8</sup> Sheikh Mohammad Al Thani,<sup>8</sup> and Roberto Bertollini<sup>8</sup>

<sup>1</sup>*Infectious Disease Epidemiology Group, Weill Cornell Medicine-Qatar, Cornell University, Doha, Qatar*

<sup>2</sup>*World Health Organization Collaborating Centre for Disease Epidemiology Analytics on HIV/AIDS, Sexually Transmitted Infections, and Viral Hepatitis, Weill Cornell Medicine-Qatar, Cornell University, Qatar Foundation – Education City, Doha, Qatar*

<sup>3</sup>*Department of Population Health Sciences, Weill Cornell Medicine, Cornell University, New York, New York, USA*

<sup>4</sup>*Department of Mathematics, Statistics, and Physics, Qatar University, Doha, Qatar*

<sup>5</sup>*Hamad Medical Corporation, Doha, Qatar*<sup>6</sup>*College of Health Sciences, QU Health, Qatar University, Doha, Qatar*

<sup>7</sup>*Primary Health Care Corporation, Doha, Qatar*

<sup>8</sup>*Ministry of Public Health, Doha, Qatar*

Address reprints requests or correspondence to Professor Laith J. Abu-Raddad, Infectious Disease Epidemiology Group, World Health Organization Collaborating Centre for Disease Epidemiology Analytics on HIV/AIDS, Sexually Transmitted Infections, and Viral Hepatitis, Weill Cornell Medicine - Qatar, Qatar Foundation - Education City, P.O. Box 24144, Doha, Qatar. Telephone: +(974) 4492-8321. Fax: +(974) 4492-8333. E-mail: [lja2002@qatar-med.cornell.edu](mailto:lja2002@qatar-med.cornell.edu).

**Supplementary Text S1. SARS-CoV-2 population-based survey questionnaire.**

**Oatar National Identification Number**

| 1. Data Collector Information                                                          |                                                                                                                                                               |
|----------------------------------------------------------------------------------------|---------------------------------------------------------------------------------------------------------------------------------------------------------------|
| Form completion date (DD/MM/YYYY)                                                      | ___/___ / ___                                                                                                                                                 |
| Primary Health Care Corporation Center                                                 |                                                                                                                                                               |
|                                                                                        |                                                                                                                                                               |
| 2. Identifier information                                                              |                                                                                                                                                               |
| First name                                                                             |                                                                                                                                                               |
| Surname                                                                                |                                                                                                                                                               |
| Sex                                                                                    | <input type="checkbox"/> Male <input type="checkbox"/> Female <input type="checkbox"/> Not known                                                              |
| Date of Birth (DD/MM/YYYY)                                                             | ___/___ / ___                                                                                                                                                 |
| Telephone (mobile) number                                                              |                                                                                                                                                               |
| Age (years)                                                                            |                                                                                                                                                               |
| Nationality                                                                            |                                                                                                                                                               |
| Education                                                                              |                                                                                                                                                               |
| Occupation                                                                             |                                                                                                                                                               |
| Have you had contact with anyone with suspected or confirmed COVID-19 virus infection? | <input type="checkbox"/> Yes <input type="checkbox"/> No <input type="checkbox"/> Unknown<br><br>If Yes, dates of last contact (DD/MM/YYYY):<br>___/___ / ___ |
| 3. Symptom history                                                                     |                                                                                                                                                               |
| In the past TWO WEEKS, have you had any of the following:                              |                                                                                                                                                               |
| Fever $\geq 38^{\circ}\text{C}$                                                        | <input type="checkbox"/> Yes <input type="checkbox"/> No                                                                                                      |
| Chills                                                                                 | <input type="checkbox"/> Yes <input type="checkbox"/> No                                                                                                      |
| Fatigue                                                                                | <input type="checkbox"/> Yes <input type="checkbox"/> No                                                                                                      |
| Muscle ache (myalgia)                                                                  | <input type="checkbox"/> Yes <input type="checkbox"/> No                                                                                                      |
| Sore throat                                                                            | <input type="checkbox"/> Yes <input type="checkbox"/> No                                                                                                      |
| Cough                                                                                  | <input type="checkbox"/> Yes <input type="checkbox"/> No                                                                                                      |
| Runny nose (rhinorrhea)                                                                | <input type="checkbox"/> Yes <input type="checkbox"/> No                                                                                                      |
| Shortness of breath (dyspnea)                                                          | <input type="checkbox"/> Yes <input type="checkbox"/> No                                                                                                      |
| Wheezing                                                                               | <input type="checkbox"/> Yes <input type="checkbox"/> No                                                                                                      |
| Chest pain                                                                             | <input type="checkbox"/> Yes <input type="checkbox"/> No                                                                                                      |
| Other respiratory symptoms                                                             | <input type="checkbox"/> Yes <input type="checkbox"/> No                                                                                                      |
| Headache                                                                               | <input type="checkbox"/> Yes <input type="checkbox"/> No                                                                                                      |
| Nausea/vomiting                                                                        | <input type="checkbox"/> Yes <input type="checkbox"/> No                                                                                                      |
| Abdominal pain                                                                         | <input type="checkbox"/> Yes <input type="checkbox"/> No                                                                                                      |
| Diarrhea                                                                               | <input type="checkbox"/> Yes <input type="checkbox"/> No                                                                                                      |
| Loss of sense of smell                                                                 | <input type="checkbox"/> Yes <input type="checkbox"/> No                                                                                                      |
| Loss of sense of taste                                                                 | <input type="checkbox"/> Yes <input type="checkbox"/> No                                                                                                      |
| Did any of these symptoms require you to seek medical attention?                       | <input type="checkbox"/> Yes <input type="checkbox"/> No <input type="checkbox"/> Unknown                                                                     |
| Did any of these symptoms require you to be hospitalized?                              | <input type="checkbox"/> Yes <input type="checkbox"/> No <input type="checkbox"/> Unknown                                                                     |

**Supplementary Table S1.** Socio-demographic characteristics of participants in the community survey conducted on May 6-7, 2020 with respect to study recruitment/invitation status.

| Socio-demographic characteristics | Invited (probability-based sampling; sample=268) | Not invited (convenience sampling; sample=687) | p-value |
|-----------------------------------|--------------------------------------------------|------------------------------------------------|---------|
|                                   | N (%*)                                           | N (%*)                                         |         |
| Sex                               |                                                  |                                                |         |
| Males                             | 216 (80.6)                                       | 559 (81.4)                                     | 0.784   |
| Females                           | 52 (19.4)                                        | 128 (18.6)                                     |         |
| Age (years)                       |                                                  |                                                |         |
| <30                               | 36 (13.4)                                        | 184 (26.8)                                     | <0.001  |
| 30-39                             | 88 (32.8)                                        | 302 (44.0)                                     |         |
| 40-49                             | 64 (23.9)                                        | 125 (18.2)                                     |         |
| 50+                               | 80 (29.9)                                        | 76 (11.1)                                      |         |
| Nationality                       |                                                  |                                                |         |
| Other <sup>†</sup>                | 68 (25.4)                                        | 139 (20.2)                                     | <0.001  |
| Indian                            | 78 (29.1)                                        | 273 (39.7)                                     |         |
| Filipino                          | 7 (2.6)                                          | 58 (8.4)                                       |         |
| Sri Lankan                        | 3 (1.1)                                          | 18 (2.6)                                       |         |
| Egyptian                          | 30 (11.2)                                        | 52 (7.6)                                       |         |
| Nepalese                          | 6 (2.2)                                          | 12 (1.8)                                       |         |
| Bangladeshi                       | 2 (0.8)                                          | 7 (1.0)                                        |         |
| Pakistani                         | 9 (3.4)                                          | 9 (1.3)                                        |         |
| Sudanese                          | 6 (2.2)                                          | 10 (1.5)                                       |         |
| Qatari                            | 59 (22.0)                                        | 109 (15.9)                                     |         |
| Educational attainment            |                                                  |                                                |         |
| Bachelor's degree                 | 129 (48.1)                                       | 291 (42.4)                                     | 0.001   |
| High school                       | 90 (33.6)                                        | 282 (41.1)                                     |         |
| Post-graduate studies             | 41 (15.3)                                        | 63 (9.2)                                       |         |
| Unknown                           | 8 (3.0)                                          | 51 (7.4)                                       |         |
| Occupation                        |                                                  |                                                |         |
| Healthcare                        | 15 (5.7)                                         | 30 (4.4)                                       | 0.217   |
| Aviation/Police/Government        | 18 (6.8)                                         | 34 (5.0)                                       |         |
| Hospitality/Retail/Education      | 33 (12.5)                                        | 66 (9.7)                                       |         |
| Professional/Office               | 73 (27.6)                                        | 191 (27.9)                                     |         |
| Transportation/driver             | 15 (5.7)                                         | 62 (9.1)                                       |         |
| Construction/Blue collar jobs     | 53 (20.0)                                        | 114 (16.7)                                     |         |
| Not employed                      | 29 (10.9)                                        | 88 (12.9)                                      |         |
| Unknown/Other                     | 29 (10.9)                                        | 99 (14.5)                                      |         |

\*Column percentages.

**Supplementary Table S2.** Reported symptoms by individuals tested for SARS-CoV-2 by PCR during the community survey conducted on May 6-7, 2020 and associations with current infection.

| Characteristics            | Sample size* | Sample with confirmed test results | SARS-CoV-2 positive <sup>†</sup> |         | Univariable regression analysis |         |
|----------------------------|--------------|------------------------------------|----------------------------------|---------|---------------------------------|---------|
|                            | N (%)        | N (% <sup>‡</sup> )                | N (% <sup>§</sup> )              | p-value | OR (95% CI) <sup>¶</sup>        | p-value |
| Fever                      |              |                                    |                                  |         |                                 |         |
| No                         | 1,063 (93.6) | 1,045 (92.4)                       | 100 (11.7)                       | <0.001  | 1.00                            | <0.001  |
| Yes                        | 73 (6.4)     | 69 (7.6)                           | 33 (56.8)                        |         | 9.93 (4.06-24.29)               |         |
| Chills                     |              |                                    |                                  |         |                                 |         |
| No                         | 1,131 (99.6) | 1,109 (99.4)                       | 132 (15.1)                       | 0.772   | 1.00                            | 0.774   |
| Yes                        | 5 (0.4)      | 5 (0.6)                            | 1 (11.2)                         |         | 0.71 (0.06-7.62)                |         |
| Fatigue                    |              |                                    |                                  |         |                                 |         |
| No                         | 1,115 (98.1) | 1,095 (97.7)                       | 126 (14.0)                       | <0.001  | 1.00                            | 0.003   |
| Yes                        | 21 (1.9)     | 19 (2.3)                           | 7 (62.5)                         |         | 10.22 (2.17-48.11)              |         |
| Muscle ache                |              |                                    |                                  |         |                                 |         |
| No                         | 1,109 (97.6) | 1,090 (98.5)                       | 125 (14.8)                       | 0.016   | 1.00                            | 0.022   |
| Yes                        | 27 (2.4)     | 24 (1.5)                           | 8 (35.7)                         |         | 3.20 (1.18-8.64)                |         |
| Sore throat                |              |                                    |                                  |         |                                 |         |
| No                         | 1,035 (91.1) | 1,017 (91.9)                       | 110 (14.5)                       | 0.195   | 1.00                            | 0.199   |
| Yes                        | 101 (8.9)    | 97 (8.1)                           | 23 (22.1)                        |         | 1.68 (0.76-3.69)                |         |
| Cough                      |              |                                    |                                  |         |                                 |         |
| No                         | 1,019 (89.7) | 1,003 (91.0)                       | 103 (14.5)                       | 0.183   | 1.00                            | 0.186   |
| Yes                        | 117 (10.3)   | 111 (9.0)                          | 30 (21.5)                        |         | 1.62 (0.79-3.31)                |         |
| Runny nose                 |              |                                    |                                  |         |                                 |         |
| No                         | 1,091 (96.0) | 1,070 (96.0)                       | 129 (14.5)                       | 0.249   | 1.00                            | 0.265   |
| Yes                        | 45 (4.0)     | 44 (4.0)                           | 4 (30.5)                         |         | 2.60 (0.48-13.91)               |         |
| Shortness of breath        |              |                                    |                                  |         |                                 |         |
| No                         | 1,111 (97.8) | 1,090 (98.5)                       | 129 (15.1)                       | 0.981   | 1.00                            | 0.981   |
| Yes                        | 25 (2.2)     | 24 (1.5)                           | 4 (15.3)                         |         | 1.01 (0.32-3.20)                |         |
| Wheezing                   |              |                                    |                                  |         |                                 |         |
| No                         | 1,129 (99.4) | 1,107 (99.2)                       | 132 (15.2)                       | 0.596   | 1.00                            | 0.602   |
| Yes                        | 7 (0.6)      | 7 (0.8)                            | 1 (8.9)                          |         | 0.55 (0.06-5.28)                |         |
| Chest pain                 |              |                                    |                                  |         |                                 |         |
| No                         | 1,110 (97.7) | 1,089 (98.4)                       | 125 (14.9)                       | 0.140   | 1.00                            | 0.147   |
| Yes                        | 26 (2.3)     | 25 (1.6)                           | 8 (25.9)                         |         | 1.99 (0.78-5.07)                |         |
| Other respiratory symptoms |              |                                    |                                  |         |                                 |         |
| No                         | 1,131 (99.6) | 1,109 (99.7)                       | 130 (14.9)                       | 0.002   | 1.00                            | 0.013   |
| Yes                        | 5 (0.4)      | 5 (0.3)                            | 3 (64.8)                         |         | 10.49 (1.65-66.68)              |         |
| Headache                   |              |                                    |                                  |         |                                 |         |
| No                         | 1,054 (92.8) | 1,037 (93.9)                       | 117 (14.1)                       | 0.083   | 1.00                            | 0.094   |
| Yes                        | 82 (7.2)     | 77 (6.1)                           | 16 (30.6)                        |         | 2.69 (0.84-8.55)                |         |
| Nausea/Vomiting            |              |                                    |                                  |         |                                 |         |
| No                         | 1,130 (99.5) | 1,108 (98.6)                       | 130 (14.2)                       | <0.001  | 1.00                            | 0.003   |
| Yes                        | 6 (0.5)      | 6 (1.4)                            | 3 (81.8)                         |         | 27.17 (3.08-239.45)             |         |
| Abdominal pain             |              |                                    |                                  |         |                                 |         |
| No                         | 1,128 (99.3) | 1,106 (99.5)                       | 130 (15.0)                       | 0.047   | 1.00                            | 0.068   |
| Yes                        | 8 (0.7)      | 8 (0.5)                            | 3 (42.5)                         |         | 4.19 (0.90-19.50)               |         |
| Diarrhea                   |              |                                    |                                  |         |                                 |         |
| No                         | 1,126 (99.1) | 1,104 (99.3)                       | 130 (15.0)                       | 0.092   | 1.00                            | 0.111   |
| Yes                        | 10 (0.9)     | 10 (0.7)                           | 3 (36.1)                         |         | 3.21 (0.77-13.48)               |         |
| Loss of sense of smell     |              |                                    |                                  |         |                                 |         |

|                        |              |              |            |        |                       |        |
|------------------------|--------------|--------------|------------|--------|-----------------------|--------|
| No                     | 1,120 (98.6) | 1,103 (99.2) | 128 (14.7) | <0.001 | 1.00                  |        |
| Yes                    | 16 (1.4)     | 11 (0.8)     | 5 (67.2)   |        | 11.91 (3.22-44.0)     | <0.001 |
| Loss of sense of taste |              |              |            |        |                       |        |
| No                     | 1,126 (99.1) | 1,107 (98.6) | 128 (14.0) | <0.001 | 1.00                  |        |
| Yes                    | 10 (0.9)     | 7 (1.4)      | 5 (9.4)    |        | 104.01 (13.38-809.54) | <0.001 |

Abbreviations: CI, confidence interval. OR, odds ratio.

<sup>†</sup>Include 1,136 samples with information on symptoms

<sup>‡</sup>Only 1,114 samples with information on symptoms and confirmed results were analyzed.

<sup>§</sup>Weighted percentages by age and nationality.

<sup>¶</sup>Row percentages weighted by age and nationality.

<sup>‡</sup>Estimates are weighted by age and nationality.

**Supplementary Table S3.** Association of PCR Ct values with presence of symptoms for the SARS-CoV-2 confirmed cases identified during the community survey conducted on May 6-7, 2020.

| Target protein/gene                                           | Ct value |      |        |           | Ct value <25        |         | Univariable regression analysis |         |
|---------------------------------------------------------------|----------|------|--------|-----------|---------------------|---------|---------------------------------|---------|
|                                                               | N        | Mean | Median | Range     | N (% <sup>*</sup> ) | p-value | OR (95% CI) <sup>*</sup>        | p-value |
| N protein <sup>†</sup>                                        |          |      |        |           |                     |         |                                 |         |
| Asymptomatic                                                  | 49       | 27.5 | 27.5   | 16.8-35.7 | 21 (36.7)           | 0.041   | 1.00                            | 0.048   |
| Symptomatic                                                   | 37       | 21.0 | 21.0   | 15.2-33.0 | 26 (73.3)           |         | 4.72 (1.02-21.95)               |         |
| S protein <sup>†</sup>                                        |          |      |        |           |                     |         |                                 |         |
| Asymptomatic                                                  | 48       | 26.8 | 28.5   | 16.7-37.0 | 20 (35.8)           | 0.037   | 1.00                            | 0.044   |
| Symptomatic                                                   | 37       | 22.5 | 22.4   | 15.4-32.5 | 26 (73.3)           |         | 4.92 (1.05-23.08)               |         |
| ORF1ab <sup>†</sup>                                           |          |      |        |           |                     |         |                                 |         |
| Asymptomatic                                                  | 48       | 26.1 | 28.0   | 16.4-36.0 | 21 (37.0)           | 0.036   | 1.00                            | 0.043   |
| Symptomatic                                                   | 37       | 21.9 | 20.6   | 15.2-33.3 | 27 (74.5)           |         | 4.97 (1.05-23.51)               |         |
| E gene <sup>‡</sup>                                           |          |      |        |           |                     |         |                                 |         |
| Asymptomatic                                                  | 22       | 29.2 | 30.6   | 19.5-36.3 | 6 (20.5)            | 0.039   | 1.00                            | 0.048   |
| Symptomatic                                                   | 21       | 26.5 | 26.3   | 17.1-35.8 | 9 (64.7)            |         | 7.07 (1.02-49.19)               |         |
| All samples regardless of target protein or gene <sup>§</sup> |          |      |        |           |                     |         |                                 |         |
| Asymptomatic                                                  | 71       | 27.2 | 28.7   | 16.8-36.3 | 27 (32.2)           | 0.008   | 1.00                            | 0.010   |
| Symptomatic                                                   | 58       | 23.8 | 23.2   | 15.2-35.8 | 58 (69.9)           |         | 4.89 (1.47-16.34)               |         |

Abbreviations: CI, confidence interval. OR, odds ratio. PCR, polymerase chain reaction.

<sup>\*</sup>Estimates are weighted by age and nationality.

<sup>†</sup>Target assayed using the TaqPath™ COVID-19 Combo Kit (Thermo Fisher Scientific, USA).

<sup>‡</sup>Target assayed using the AccuPower SARS-CoV-2 Real-Time RT-PCR Kit (Bioneer, Korea).

<sup>§</sup>Ct values for N protein were used, and complemented by Ct values for E-gene in case of missing values. All individuals with Ct values for S protein or ORF1ab protein also had values for N protein.

**Supplementary Table S4.** Meta-analysis results for the pooled mean SARS-CoV-2 PCR positivity in the random testing campaigns conducted in workplaces and in residential areas, up to June 4, 2020.

|                    | Population groups    | Sample        |              | SARS-CoV-2 PCR testing positivity (%) |                    |             |                  | Heterogeneity measures     |                             |                                        |
|--------------------|----------------------|---------------|--------------|---------------------------------------|--------------------|-------------|------------------|----------------------------|-----------------------------|----------------------------------------|
|                    | Total N <sup>a</sup> | Tested        | Positive     | Median <sup>*</sup>                   | Range <sup>*</sup> | Pooled mean | 95% CI           | Q <sup>†</sup> (p-value)   | I <sup>‡</sup> (% , 95% CI) | Prediction interval <sup>§</sup> (95%) |
| Swab type          |                      |               |              |                                       |                    |             |                  |                            |                             |                                        |
| Workplace          | 347                  | 22,834        | 4,359        | 10.3                                  | 0.0-100.0          | 15.1        | 13.0-17.3        | 6494.8 (p<0.001)           | 94.7 (94.3-95.0)            | 0.0-64.2                               |
| Residential        | 45                   | 3,881         | 834          | 19.0                                  | 0.0-81.5           | 20.3        | 15.4-25.6        | 563.3 (p<0.001)            | 92.2 (90.4-93.6)            | 0.0-58.0)                              |
| Time               |                      |               |              |                                       |                    |             |                  |                            |                             |                                        |
| March <sup>¶</sup> | 4                    | 552           | 115          | 17.2                                  | 11.1-36.4          | 17.6        | 9.3-27.7         | 9.7 (p=0.022)              | 68.9 (10.2-89.3)            | 0.0-62.8                               |
| April 4-10         | 32                   | 1,856         | 128          | 3.1                                   | 0.0-70.6           | 4.9         | 1.9-8.9          | 284.5 (p<0.001)            | 89.1 (85.7-91.7)            | 0.0-35.6                               |
| April 11-17        | 28                   | 2,476         | 342          | 5.1                                   | 0.0-59.5           | 10.2        | 4.7-17.2         | 628.0 (p<0.001)            | 95.7 (94.6-96.5)            | 0.0-58.7                               |
| April 18-24        | 56                   | 5,422         | 1,130        | 18.0                                  | 0.0-71.1           | 19.7        | 14.2-25.9        | 1456.2 (p<0.001)           | 96.2 (95.6-96.7)            | 0.0-70.7                               |
| April 25-May 01    | 39                   | 2,548         | 568          | 21.6                                  | 0.0-81.8           | 21.5        | 14.8-29.1        | 659.2 (p<0.001)            | 94.2 (92.9-95.3)            | 0.0-72.5                               |
| May 02-08          | 65                   | 4,254         | 838          | 12.1                                  | 0.0-69.8           | 14.9        | 10.9-19.4        | 849.0 (p<0.001)            | 92.5 (91.1-93.6)            | 0.0-56.5                               |
| May 09-15          | 36                   | 3,189         | 837          | 23.0                                  | 0.0-85.4           | 23.1        | 15.6-31.5        | 909.6 (p<0.001)            | 96.2 (95.4-96.8)            | 0.0-77.2                               |
| May 16-22          | 56                   | 3,103         | 829          | 21.8                                  | 0.0-100.0          | 23.0        | 16.8-29.8        | 892.2 (p<0.001)            | 93.8 (92.7-94.8)            | 0.0-75.9                               |
| May 23-29          | 48                   | 2,175         | 362          | 13.4                                  | 0.0-87.9           | 15.8        | 10.6-21.7        | 471.2 (p<0.001)            | 90.0 (87.6-92.0)            | 0.0-61.2                               |
| May 30-June 04     | 28                   | 1,140         | 44           | 1.5                                   | 0.0-21.7           | 2.5         | 1.0-4.5          | 57.8 (p<0.001)             | 53.2 (28.1-69.6)            | 0.0-12.7                               |
| <b>Overall</b>     | <b>392</b>           | <b>26,715</b> | <b>5,193</b> | <b>11.5</b>                           | <b>0.0-100.0</b>   | <b>15.6</b> | <b>13.7-17.7</b> | <b>7101.2 (p&lt;0.001)</b> | <b>94.5 (94.1-94.8)</b>     | <b>0.0-63.1</b>                        |

<sup>a</sup>Testing campaign sample with sample size <10 were grouped together or with the testing campaign sample that has the lowest sample size ≥10

<sup>†</sup>Q: the Cochran's Q statistic is a measure assessing the existence of heterogeneity in effect size (here, SARS-CoV-2 PCR prevalence) across studies.

<sup>‡</sup>I<sup>2</sup>: a measure assessing the magnitude of between-study variation that is due to differences in effect size (here, SARS-CoV-2 PCR prevalence) across studies rather than chance.

<sup>§</sup>Prediction interval: a measure estimating the 95% interval of the distribution of true effect sizes (here, SARS-CoV-2 PCR prevalence measures).

<sup>¶</sup>Exact dates were not available.

**Supplementary Table S5.** Basic associations with SARS-CoV-2 severe infection in Qatar based on analysis of the national SARS-CoV-2 PCR testing and hospitalization database. Severe infection was based on WHO classification.<sup>1</sup>

| Characteristics                      | Sample size   | SARS-CoV-2 severe infection |         | Univariable analysis  |          | Multivariable analysis |                      |
|--------------------------------------|---------------|-----------------------------|---------|-----------------------|----------|------------------------|----------------------|
|                                      | N (%)         | N (%)                       | p-value | OR (95% CI)           | p-value* | AOR (95% CI)           | p-value <sup>†</sup> |
| Sex                                  |               |                             |         |                       |          |                        |                      |
| Females                              | 13,572 (14.2) | 229 (1.7)                   | <0.001  | 1.00                  |          | 1.00                   |                      |
| Males                                | 82,175 (85.8) | 2,207 (2.7)                 |         | 1.61 (1.40-1.85)      | <0.001   | 1.58 (1.35-1.84)       | <0.001               |
| Age (years)                          |               |                             |         |                       |          |                        |                      |
| 0-29                                 | 30,208 (31.5) | 92 (0.3)                    | <0.001  | 1.00                  |          | 1.00                   |                      |
| 30-39                                | 34,487 (36)   | 609 (1.8)                   |         | 5.89 (4.73-7.34)      | <0.001   | 5.57 (4.47-6.95)       | <0.001               |
| 40-49                                | 19,826 (20.7) | 750 (3.8)                   |         | 12.96 (10.43-16.10)   | <0.001   | 12.76 (10.25-15.88)    | <0.001               |
| 50-59                                | 8,333 (8.7)   | 562 (6.9)                   |         | 24.13 (19.33-30.13)   | <0.001   | 25.84 (20.66-32.32)    | <0.001               |
| 60-69                                | 2,342 (2.4)   | 316 (14.1)                  |         | 53.68 (42.37-68.02)   | <0.001   | 59.15 (46.53-75.18)    | <0.001               |
| 70-79                                | 440 (0.5)     | 84 (20.8)                   |         | 86.16 (62.83-118.14)  | <0.001   | 98.24 (70.87-136.17)   | <0.001               |
| 80+                                  | 111 (0.1)     | 23 (25.8)                   |         | 114.02 (68.00-191.18) | <0.001   | 134.99 (78.85-231.11)  | <0.001               |
| Nationality                          |               |                             |         |                       |          |                        |                      |
| All other nationalities <sup>‡</sup> | 9,501 (9.9)   | 239 (2.5)                   | <0.001  | 1.00                  |          | 1.00                   |                      |
| Indian                               | 28,111 (29.4) | 450 (1.6)                   |         | 0.63 (0.54-0.74)      | <0.001   | 0.47 (0.39-0.55)       | <0.001               |
| Bangladeshi                          | 13,604 (14.2) | 532 (3.9)                   |         | 1.58 (1.35-1.85)      | <0.001   | 1.42 (1.20-1.68)       | <0.001               |
| Nepalese                             | 17,548 (18.3) | 420 (2.4)                   |         | 0.95 (0.81-1.11)      | 0.517    | 1.06 (0.89-1.26)       | 0.531                |
| Pakistani                            | 5,967 (6.2)   | 218 (3.7)                   |         | 1.48 (1.23-1.78)      | <0.001   | 1.13 (0.93-1.38)       | 0.209                |
| Sudanese                             | 1,963 (2.1)   | 38 (1.9)                    |         | 0.76 (0.54-1.08)      | 0.129    | 0.57 (0.40-0.81)       | 0.002                |
| Sri Lankan                           | 3,433 (3.6)   | 79 (2.3)                    |         | 0.91 (0.70-1.18)      | 0.473    | 0.76 (0.58-0.99)       | 0.042                |
| Egyptian                             | 4,468 (4.7)   | 125 (2.8)                   |         | 1.11 (0.89-1.39)      | 0.333    | 0.86 (0.69-1.08)       | 0.207                |
| Filipino                             | 5,116 (5.3)   | 207 (4.1)                   |         | 1.64 (1.36-1.99)      | <0.001   | 1.35 (1.11-1.65)       | 0.003                |
| Qatari                               | 6,036 (6.3)   | 128 (2.1)                   |         | 0.84 (0.68-1.04)      | 0.112    | 0.82 (0.65-1.04)       | 0.101                |
| Time                                 |               |                             |         |                       |          |                        |                      |
| 05 Feb-31 March                      | 1,427 (1.5)   | 44 (3.1)                    | <0.001  | 1.00                  |          | 1.00                   |                      |
| 01-15 April                          | 3,270 (3.4)   | 134 (4.2)                   |         | 1.33 (0.94-1.89)      | 0.104    | 1.75 (1.22-2.50)       | 0.002                |
| 16-30 April                          | 9,732 (10.2)  | 272 (2.8)                   |         | 0.89 (0.65-1.23)      | 0.494    | 1.26 (0.91-1.77)       | 0.169                |
| 01-15 May                            | 17,221 (18.0) | 483 (2.8)                   |         | 0.89 (0.65-1.22)      | 0.486    | 1.28 (0.93-1.77)       | 0.137                |
| 16-31 May                            | 27,692 (28.9) | 812 (3.0)                   |         | 0.94 (0.69-1.27)      | 0.671    | 1.27 (0.92-1.74)       | 0.143                |
| 01-15 June                           | 23,838 (24.9) | 640 (2.7)                   |         | 0.85 (0.62-1.16)      | 0.311    | 1.17 (0.85-1.61)       | 0.348                |
| 16-24 June                           | 12,567 (13.1) | 51 (0.4)                    |         | 0.13 (0.08-0.19)      | <0.001   | 0.17 (0.11-0.26)       | <0.001               |

Abbreviations: AOR, adjusted odds ratio. CI, confidence interval. OR, odds ratio. PCR, polymerase chain reaction.

\*Covariates with p-value ≤0.1 in the univariable analysis were included in the multivariable analysis.

†Covariates with p-value ≤0.05 in the multivariable analysis were considered predictors of SARS-CoV-2 severe infection.

‡These include all other nationalities residing in Qatar.



**Supplementary Table S6.** Basic associations with SARS-CoV-2 critical infection in Qatar based on analysis of the national SARS-CoV-2 PCR testing and hospitalization database. Critical infection was based on WHO classification.<sup>1</sup>

| Characteristics                      | Sample size   | SARS-CoV-2 critical infection |         | Univariable analysis    |          | Multivariable analysis |                      |                          |        |
|--------------------------------------|---------------|-------------------------------|---------|-------------------------|----------|------------------------|----------------------|--------------------------|--------|
|                                      | N (%)         | N (%)                         | p-value | OR (95% CI)             | p-value* | AOR (95% CI)           | p-value <sup>†</sup> |                          |        |
| Sex                                  |               |                               |         |                         |          |                        |                      |                          |        |
| Females                              | 13,572 (14.2) | 52 (0.4)                      | 0.002   | 1.00                    | 0.002    | 1.00                   | 0.004                |                          |        |
| Males                                | 82,175 (85.8) | 487 (0.6)                     |         | 1.57 (1.18-2.09)        |          | 1.58 (1.16-2.16)       |                      |                          |        |
| Age (years)                          |               |                               |         |                         |          |                        |                      |                          |        |
| 0-29                                 | 30,208 (31.5) | 14 (0.05)                     | <0.001  | 1.00                    |          | 1.00                   |                      |                          |        |
| 30-39                                | 34,487 (36.0) | 76 (0.2)                      |         | 4.83 (2.73-8.55)        |          | <0.001                 |                      | 4.30 (2.43-7.61)         | <0.001 |
| 40-49                                | 19,826 (20.7) | 138 (0.7)                     |         | 15.67 (9.04-27.16)      |          | <0.001                 |                      | 14.26 (8.21-24.77)       | <0.001 |
| 50-59                                | 8,333 (8.7)   | 152 (2.0)                     |         | 42.90 (24.80-74.20)     |          | <0.001                 |                      | 42.17 (24.30-73.19)      | <0.001 |
| 60-69                                | 2,342 (2.4)   | 100 (4.9)                     |         | 111.64 (63.69-195.67)   |          | <0.001                 |                      | 117.78 (66.86-207.49)    | <0.001 |
| 70-79                                | 440 (0.5)     | 37 (10.4)                     |         | 249.39 (133.51-465.83)  |          | <0.001                 |                      | 298.20 (156.62-567.77)   | <0.001 |
| 80+                                  | 111 (0.1)     | 22 (25.0)                     |         | 716.71 (351.57-1461.10) |          | <0.001                 |                      | 1163.70 (544.87-2485.34) | <0.001 |
| Nationality                          |               |                               |         |                         |          |                        |                      |                          |        |
| All other nationalities <sup>‡</sup> | 9,501 (9.9)   | 55 (0.6)                      | <0.001  | 1.00                    |          | 1.00                   |                      |                          |        |
| Indian                               | 28,111 (29.4) | 119 (0.4)                     |         | 0.72 (0.52-1.00)        |          | 0.048                  |                      | 0.69 (0.49-0.98)         | 0.040  |
| Bangladeshi                          | 13,604 (14.2) | 107 (0.8)                     |         | 1.38 (1.00-1.91)        |          | 0.052                  |                      | 1.69 (1.18-2.42)         | 0.004  |
| Nepalese                             | 17,548 (18.3) | 65 (0.4)                      |         | 0.64 (0.44-0.91)        |          | 0.014                  |                      | 1.12 (0.75-1.66)         | 0.578  |
| Pakistani                            | 5,967 (6.2)   | 62 (1.1)                      |         | 1.83 (1.27-2.63)        |          | 0.001                  |                      | 1.36 (0.93-2.01)         | 0.116  |
| Sudanese                             | 1,963 (2.1)   | 11 (0.6)                      |         | 0.96 (0.50-1.84)        |          | 0.907                  |                      | 0.88 (0.45-1.72)         | 0.708  |
| Sri Lankan                           | 3,433 (3.6)   | 10 (0.3)                      |         | 0.50 (0.25-0.98)        |          | 0.045                  |                      | 0.60 (0.30-1.19)         | 0.145  |
| Egyptian                             | 4,468 (4.7)   | 22 (0.5)                      |         | 0.85 (0.52-1.40)        |          | 0.527                  |                      | 0.83 (0.50-1.39)         | 0.484  |
| Filipino                             | 5,116 (5.3)   | 59 (1.2)                      |         | 2.04 (1.41-2.95)        |          | <0.001                 |                      | 2.36 (1.59-3.51)         | <0.001 |
| Qatari                               | 6,036 (6.3)   | 29 (0.5)                      |         | 0.83 (0.53-1.30)        |          | 0.405                  |                      | 0.63 (0.39-1.02)         | 0.059  |
| Time                                 |               |                               |         |                         |          |                        |                      |                          |        |
| 05 Feb-31 March                      | 1,427 (1.5)   | 29 (2.1)                      | <0.001  | 1.00                    |          | 1.00                   |                      |                          |        |
| 01-15 April                          | 3,270 (3.4)   | 43 (1.4)                      |         | 0.65 (0.40-1.04)        |          | 0.075                  |                      | 0.95 (0.58-1.56)         | 0.839  |
| 16-30 April                          | 9,732 (10.2)  | 90 (1.0)                      |         | 0.45 (0.29-0.68)        |          | <0.001                 |                      | 0.68 (0.44-1.06)         | 0.090  |
| 01-15 May                            | 17,221 (18.0) | 124 (0.7)                     |         | 0.35 (0.23-0.52)        |          | <0.001                 |                      | 0.53 (0.34-0.82)         | 0.004  |
| 16-31 May                            | 27,692 (28.9) | 169 (0.6)                     |         | 0.30 (0.20-0.44)        |          | <0.001                 |                      | 0.42 (0.28-0.64)         | <0.001 |
| 01-15 June                           | 23,838 (24.9) | 78 (0.3)                      |         | 0.16 (0.10-0.24)        |          | <0.001                 |                      | 0.21 (0.14-0.34)         | <0.001 |
| 16-24 June                           | 12,567 (13.1) | 6 (0.05)                      |         | 0.02 (0.01-0.05)        |          | <0.001                 |                      | 0.03 (0.01-0.07)         | <0.001 |

Abbreviations: AOR, adjusted odds ratio. CI, confidence interval. OR, odds ratio.

Proportions were reported using one decimal place, except for those <0.1% which were reported using two decimal places.

\*Covariates with p-value ≤0.1 in the univariable analysis were included in the multivariable analysis.

†Covariates with p-value ≤0.05 in the multivariable analysis were considered predictors of SARS-CoV-2 critical infection.

‡These include all other nationalities residing in Qatar.

**Supplementary Table S7.** Basic associations with COVID-19 death in Qatar based on analysis of the national COVID-19 mortality database. COVID-19 death was based on WHO classification.<sup>2</sup>

| Characteristics                      | Total infections |           | Deaths  |                        | Univariable regression analysis |                        | Multivariable regression analysis |  |
|--------------------------------------|------------------|-----------|---------|------------------------|---------------------------------|------------------------|-----------------------------------|--|
|                                      | N (%)            | N (%)     | p-value | OR (95% CI)            | p-value*                        | AOR (95% CI)           | p-value <sup>†</sup>              |  |
| Sex                                  |                  |           |         |                        |                                 |                        |                                   |  |
| Males                                | 82,152 (85.8)    | 80 (0.1)  | 0.919   | 1.00                   |                                 | --                     | --                                |  |
| Females                              | 13,548 (14.2)    | 13 (0.1)  |         | 0.99 (0.55-1.77)       | 0.961                           | --                     | --                                |  |
| Age (years)                          |                  |           |         |                        |                                 |                        |                                   |  |
| <50                                  | 84,471 (88.3)    | 16 (0.02) | <0.001  | 1.00                   |                                 | 1.00                   |                                   |  |
| 50-59                                | 8,335 (8.7)      | 30 (0.4)  |         | 19.07 (10.39-34.99)    | <0.001                          | 20.21 (10.88-37.55)    | <0.001                            |  |
| 60-69                                | 2,343 (2.4)      | 23 (1.1)  |         | 52.33 (27.61-99.18)    | <0.001                          | 55.14 (28.21-107.80)   | <0.001                            |  |
| 70+                                  | 551 (0.6)        | 24 (5.0)  |         | 240.38 (126.96-455.13) | <0.001                          | 309.37 (148.91-642.74) | <0.001                            |  |
| Nationality                          |                  |           |         |                        |                                 |                        |                                   |  |
| All other nationalities <sup>‡</sup> | 9,489 (9.9)      | 10 (0.1)  | <0.001  | 1.00                   |                                 | 1.00                   |                                   |  |
| Indian                               | 28,105 (29.4)    | 4 (0.1)   |         | 0.30 (0.16-0.58)       | <0.001                          | 0.49 (0.24-0.99)       | 0.046                             |  |
| Bangladeshi                          | 13,607 (14.2)    | 17 (0.1)  |         | 0.62 (0.32-1.20)       | 0.157                           | 1.28 (0.63-2.62)       | 0.500                             |  |
| Nepalese                             | 17,546 (18.3)    | 7 (0.04)  |         | 0.20 (0.08-0.47)       | <0.001                          | 0.87 (0.34-2.23)       | 0.770                             |  |
| Pakistani                            | 5,958 (6.2)      | 15 (0.3)  |         | 1.26 (0.64-2.48)       | 0.507                           | 0.86 (0.43-1.72)       | 0.661                             |  |
| Sudanese                             | 1,964 (2.1)      | 5 (0.9)   |         | 0.76 (0.23-2.58)       | 0.663                           | 0.80 (0.23-2.78)       | 0.721                             |  |
| Sri Lankan                           | 3,433 (3.6)      | 17 (0.1)  |         | 1.00 (1.00-1.00)       | --                              | 1.00 (1.00-1.00)       | --                                |  |
| Egyptian                             | 4,458 (4.7)      | 10 (0.2)  |         | 0.11 (0.01-0.84)       | 0.033                           | 0.14 (0.02-1.09)       | 0.060                             |  |
| Filipino                             | 5,115 (5.3)      | 4 (0.9)   |         | 0.98 (0.45-2.10)       | 0.951                           | 1.79 (0.79-4.07)       | 0.166                             |  |
| Qatari                               | 6,025 (6.3)      | 4 (0.7)   |         | 0.33 (0.11-0.97)       | 0.045                           | 0.2 (0.07-0.61)        | 0.004                             |  |
| Time                                 |                  |           |         |                        |                                 |                        |                                   |  |
| 05 Feb-31 March                      | 1,425 (1.5)      | 8 (0.6)   | <0.001  | 1.00                   |                                 | 1.00                   |                                   |  |
| 01-15 April                          | 3,265 (3.4)      | 4 (0.1)   |         | 0.22 (0.07-0.72)       | 0.013                           | 0.31 (0.09-1.05)       | 0.061                             |  |
| 16-30 April                          | 9,733 (10.2)     | 10 (0.1)  |         | 0.18 (0.07-0.46)       | <0.001                          | 0.29 (0.11-0.77)       | 0.013                             |  |
| 01-15 May                            | 17,213 (18.0)    | 23 (0.1)  |         | 0.24 (0.11-0.53)       | <0.001                          | 0.38 (0.16-0.88)       | 0.024                             |  |
| 16-31 May                            | 27,689 (28.9)    | 41 (0.1)  |         | 0.26 (0.12-0.56)       | 0.001                           | 0.38 (0.17-0.85)       | 0.018                             |  |
| 01-15 June                           | 23,817 (24.9)    | 7 (0.03)  |         | 0.05 (0.02-0.14)       | <0.001                          | 0.07 (0.03-0.20)       | <0.001                            |  |
| 16-24 June                           | 12,558 (13.1)    | 0 (0.0)   |         | 1.00 (1.00-1.00)       | --                              | 1.00 (1.00-1.00)       | --                                |  |

Abbreviations: AOR, adjusted odds ratio. CI, confidence interval. OR, odds ratio.

Proportions were reported using one decimal place, except for those <0.1% which were reported using two decimal places.

\*Covariates with p-value ≤0.1 in the univariable analysis were included in the multivariable analysis.

†Covariates with p-value ≤0.05 in the multivariable analysis were considered predictors of COVID-19 death.

‡These include all other nationalities residing in Qatar.

## References

- 1 World Health Organization. Clinical management of COVID-19. Available from: <https://www.who.int/publications-detail/clinical-management-of-covid-19>. Accessed on: May 31st 2020. (2020).
- 2 World Health Organization. International guidelines for certification and classification (coding) of COVID-19 as cause of death. Available from: [https://www.who.int/classifications/icd/Guidelines\\_Cause\\_of\\_Death\\_COVID-19-20200420-EN.pdf?ua=1](https://www.who.int/classifications/icd/Guidelines_Cause_of_Death_COVID-19-20200420-EN.pdf?ua=1). Document Number: WHO/HQ/DDI/DNA/CAT. Accessed on June 1, 2020. . (2020).
